# Supplementary material
Source: Springer Nature journal article supplement (https://www.springermedizin.de/resource/supplementary/12985_2010_982_MOESM8_ESM.pdf/9608878)

**M**

**M+KU**

**C1**

**C1+KU**

**1061**

**1061+KU**

**1084**

**1084+KU**

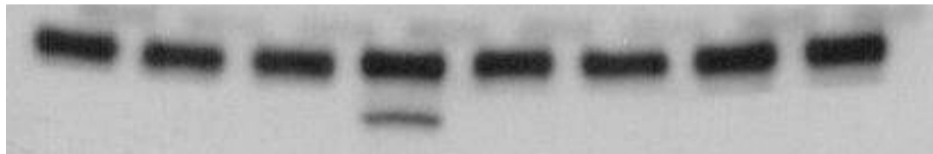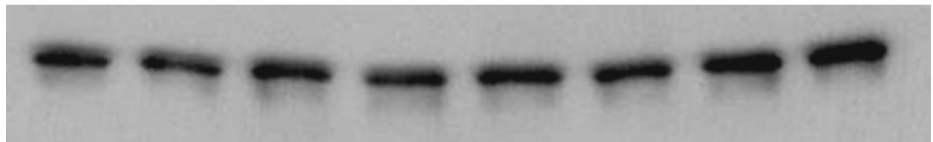

Supplement: MOESM8 [file 9608878]
